# Supplementary material for: Failure without Tears: Two-Step Attachment in a Climbing Cactus
Source: MDPI journal article supplement (doi:10.3390/biomimetics8020220), 2023-05-25
Supplement: s1 [file s1]

## Supplementary Materials Descriptions

Video S1. Spine attachment in a wind-prone habitat. The *Selenicereus setaceus* grows in several coastal habitats, including wind-prone, shrubby vegetation along the coast of eastern Brazil. This habitat experiences almost constant wind-blown conditions. In these conditions, the cactus depends on the deployment of recurved spines (step 1 attachment) to anchor the climbing stems among dense branches of shrubs.
